## PRMT5 promotes vascular morphogenesis

1 **Prmt5 promotes vascular morphogenesis in zebrafish independently of its**  
2 **methyltransferase activity.**

3 Aurelie Quillien<sup>1\*</sup>, Manon Boulet<sup>1,2</sup>, Severine Ethuin<sup>1</sup>, Laurence Vandel<sup>1,2\*</sup>

4

5

6 <sup>1</sup>Centre de Biologie du Développement (CBD), Centre de Biologie Intégrative (CBI),  
7 Université de Toulouse, CNRS, UPS, France

8 <sup>2</sup>Current affiliation : Université Clermont Auvergne, CNRS, Inserm, GReD, Clermont-  
9 Ferrand, France

10

11

12 \*Corresponding Authors

13 Aurélie Quillien (aurelie.quillien@gmail.com)

14 Laurence Vandel (laurence.vandel@uca.fr)

15

16

17

18

19

## PRMT5 promotes vascular morphogenesis

### 20 **ABSTRACT**

21 In vertebrate, blood cell formation is tightly associated with the development of the vascular  
22 system. While the transcriptional cascade underlying blood vessel formation starts to be better  
23 characterized, little is known concerning the role and mode of action of epigenetic enzymes  
24 during this process.

25 Here, we explored the role of the Protein Arginine Methyl Transferase Prmt5 during blood  
26 vessel formation and in hematopoiesis in zebrafish. Through the generation of a Prmt5 mutant,  
27 we highlight a key role of Prmt5 in both hematopoiesis and blood vessel formation. Prmt5  
28 promotes vascular morphogenesis through the transcriptional control of ETS transcription  
29 factor and adhesion proteins in endothelial cells. Moreover, we show that the  
30 methyltransferase activity of Prmt5 was not required to regulate gene expression, and  
31 comparison of chromatin architecture impact on reporter genes expression lead us to propose  
32 a role of scaffold protein for Prmt5 to facilitate chromatin looping formation in these cells.

### 33 **Key words**

34 **Prmt5; zebrafish; angiogenesis; hematopoiesis; endothelial cells; chromatin looping**

35

36

37

38

39

40

41

42

43

44

### 45 **INTRODUCTION**

## PRMT5 promotes vascular morphogenesis

46 In vertebrate, blood cell formation is tightly associated with the development of the vascular  
47 system. Hematopoietic Stem Cells (HSC) which give rise to the different blood cell lineages  
48 emerge directly from the ventral part of the dorsal aorta, an area referred to as the hemogenic  
49 endothelium. VEGF (Vascular Endothelial Growth factor) signaling is crucial for the formation  
50 of both tissues, as animals deficient for VEGFA or VEGFR2 exhibit a lack of blood cells and  
51 vasculature and die prematurely (Carmeliet et al., 1996; Shalaby et al., 1997; Covassin et al.,  
52 2009, 2006). ETS transcription factor ETV2 functions as a master regulator for the formation  
53 of endothelial and hematopoietic cell lineages through the induction of both transcriptional  
54 programs (Wong et al., 2009, Liu et al 2015). In endothelial cells, ETV2 regulates the  
55 expression of other ETS transcription factors, VEGF signaling receptors and effectors, Rho-  
56 GTPases and adhesion molecules (Wong et al., 2009, Liu et al 2015). Adhesion molecules  
57 have been shown to be crucial players for vascular morphogenesis. For instance, Vascular  
58 Endothelial cadherin (VE-cad/ *cdh5*) and endothelial cell-selective adhesion molecule (Esama)  
59 are essential for junction remodeling and blood vessel elongation in zebrafish (Sauter et al  
60 2014, 20117). Indeed, loss of function of both *cdh5* and *esama* leads to the formation of  
61 disconnected vessels and delayed lumen formation. Likewise, knock down of the scaffold  
62 protein Amolt2 which associates to VE-cadherin also leads to sprout elongation defects and  
63 narrowed aortic lumen (Hultin et al, 2014). While the transcriptional cascade underlying blood  
64 vessel formation starts to be better characterized, little is known concerning the role and mode  
65 of action of epigenetic enzymes during this process. While the role of chromatin-modifying  
66 enzymes has been described as central in cardiovascular disease and development (Rosa-  
67 Garrido et al. 2018, Shailesh et al 2018), only few examples illustrate in detail the role of  
68 epigenetic enzymes during blood vessel development. For instance, the chromatin-remodeling  
69 enzyme BRG1 affects early vascular development as well as hematopoiesis in mice (Griffin et  
70 al. 2008). The histone acetyltransferase P300 has been proposed to be recruited at the  
71 promoter of specific endothelial genes by the ETS transcription factor ERG (ETS Related  
72 Gene) to control gene expression both *in vivo* in zebrafish and in HUVEC (Human Umbilical  
73 Vein Endothelial Cell) (Fish et al 2017; Kalna et al 2019).

## PRMT5 promotes vascular morphogenesis

74 Given the common origin of blood and endothelial cells, and their partially shared  
75 transcriptional programs, it is plausible that known chromatin-modifying enzyme affecting  
76 hematopoiesis could also perturb blood vessel formation. Along this line, the epigenetic  
77 enzyme Prmt5 (Protein Arginine Methyltransferase 5) has been identified as a key player in  
78 blood cell formation (Liu et al 2015) but its impact in endothelial development has not been  
79 investigated to date. Prmt5 catalyzes the symmetric di-methylation of arginine on a wide variety  
80 of proteins including histones and therefore acts on many cellular processes such as, genome  
81 organization, transcription, differentiation, cell cycle regulation or spliceosome assembly  
82 among others (Blanc and Richard, 2017; Stopa et al., 2015; Karkhanis et al, 2011). Prmt5 is  
83 mainly known to repress transcription through the methylation of arginine residues on histones  
84 H3 and H4. Prmt5 has been shown to regulate several differentiation processes such as  
85 myogenesis, oligodendrocyte and germ cell differentiation or hematopoiesis (Shailesh et al  
86 2018, Batut et al., 2011, Zhu et al. 2019, Liu et al 2015). In mice, *prmt5* knock out is embryonic  
87 lethal as it prevents pluripotent cells to form from the inner cell mass (ICM) (Tee et al., 2010).  
88 Conditional loss of *prmt5*, leads to severe anemia and pancytopenia in mice and Prmt5  
89 maintains HSC as well as ensures proper blood cell progenitor expansion (Liu et al 2015). The  
90 loss of *prmt5* leads to oxidative DNA damages, increased cell apoptosis due to p53  
91 dysregulation and as a consequence, to HSC exhaustion. In this context, Prmt5 protects HSC  
92 from DNA damages, by allowing the splicing of genes involved in DNA repair that are  
93 particularly sensitive to these damages (Tan et al 2019).

94 Here, we explored the role of the Protein Arginine Methyl Transferase Prmt5 during blood  
95 vessel formation and in hematopoiesis in zebrafish. Through the generation of a Prmt5 mutant,  
96 we highlight the key role of this gene during vascular morphogenesis *via* the control of  
97 expression of several ETS transcription factors and adhesion molecules. Moreover, we show  
98 that Prmt5 methyltransferase activity is not required for blood vessel formation and propose  
99 that Prmt5 helps to shape correct chromatin conformation in endothelial cells.

## 100 RESULTS

## PRMT5 promotes vascular morphogenesis

### 101 ***Prmt5 is required for HSC maintenance and lymphoid progenitor expansion***

102 To characterize *prmt5* function, we generated a *prmt5* mutant by targeting the second exon of  
103 *prmt5* with the CRISPR/Cas9 system. A deletion of 23 nucleotides was obtained, leading to a  
104 premature stop codon before the catalytic domain of Prmt5 (Fig. 1A). As a consequence,  
105 Prmt5, which was expressed ubiquitously in the trunk at 24hpf, was no longer detected in the  
106 mutant (Fig. 1B, C). Similarly, Prmt5 expression was severely reduced in *prmt5* morpholino-  
107 injected embryos (Batut et al. 2011) as compared to control morphants (Fig. S1 A, B). In order  
108 to test whether Prmt5 regulates hematopoiesis in zebrafish in a similar way as in mouse, we  
109 took advantage of the transgenic line *Tg(gata2b:Gal4;UAS:lifeactGFP)* that labels  
110 Hematopoietic Stem Cells (HSC) that are positive for *gata2b* (Butko et al. 2015). HSCs emerge  
111 from the ventral wall of the dorsal aorta (DA, Fig. 1D-F'), before migrating into the Caudal  
112 Hematopoietic Tissue (CHT) (Fig. 1D) where Hematopoietic Stem and Progenitor Cells  
113 (HSPCs) proliferate and undergo maturation (Butko et al. 2015). In agreement with the data  
114 published in mice (Liu et al, 2015), the loss of *prmt5* led to an increased number of *gata2b+*  
115 HSCs in 36 hpf mutant embryos as compared to wild type ones (Fig. 1E-G). In addition, we  
116 found that the relative expression of *scla*, *runx1* or *cmyb* that are specifically expressed in  
117 emerging HSCs was increased in *prmt5* mutant embryos as compared to wild type embryos  
118 (Fig. 1H). These results suggest that Prmt5 regulates the number of emerging HSCs from the  
119 dorsal aorta. We next investigated whether blood cell formation was impaired in *prmt5*  
120 zebrafish mutant as described in mouse (Liu et al, 2015). HSPCs give rise to different blood  
121 cell progenitors, such as lymphoid progenitors which colonize the thymus leading to T  
122 lymphopoiesis (Fig. 1D) (Ma et al, 2013). As *gata2b+* lymphoid progenitors deriving from  
123 *gata2b+* HSCs, can be detected in the thymus of transgenic zebrafish larvae at day 3 (Butko  
124 et al. 2015), we investigated whether Prmt5 could act on these progenitors. Indeed, we found  
125 that at 5 days, the number of *gata2b+* lymphoid progenitors in the thymus was significantly  
126 reduced in *prmt5* mutant embryos as compared to wild type embryos (Fig. 1I-K), suggesting

## PRMT5 promotes vascular morphogenesis

127 that Prmt5 is required for hematopoietic progenitor expansion. Altogether, these data indicate  
128 an important and conserved role of Prmt5 during hematopoiesis in zebrafish as in mouse.

### 129 ***Prmt5 is required for vascular morphogenesis***

130 As Prmt5 regulates zebrafish hematopoiesis, we next wanted to know whether Prmt5 could  
131 also play a role during blood vessel formation, either during angiogenesis or vasculogenesis.  
132 First, we analyzed the expression and localization of Prmt5 by immunostaining in  
133 *Tg(fli1a:eGFP)* transgenic embryos, in which endothelial cells can be visualized with *egfp*  
134 (Lawson and Weinstein 2002). We found that Prmt5 was expressed ubiquitously, and in early  
135 endothelial cells at 14 somite stage (Fig. 2A-A’). At 24 hpf, Prmt5 was expressed in endothelial  
136 cells of the dorsal aorta (DA) and of the cardinal vein (CV) (Fig. 2B, B’, D). Prmt5 was also  
137 expressed in Intersegmental Vessels (ISVs) sprouting from the DA, in either the tip cell (leading  
138 the sprout) or the stalk cell (Fig. 2C, C’, D). We then analyzed whether blood vessel formation  
139 was affected in transgenic *Tg(fli1a:eGFP) prmt5* mutants at 28 hpf. Dorsal aorta diameter of  
140 mutant embryos was reduced as compared to the control (Fig. 2D, E, F close-ups), suggested  
141 that lumen formation was perturbed in the mutant context. To further confirm this result, we  
142 took advantage of the Notch reporter line *Tg(TP1bglob:VenusPEST)<sup>s940</sup>* in which only the  
143 dorsal aorta cells expressed the transgene while cardinal vein endothelial cells did not (Ninov  
144 et al, 2012, Quillien et al, 2014). In this transgenic context the area occupied by the dorsal  
145 aorta in *prmt5* morphant embryos was significantly reduced as compared to control embryos  
146 (Fig. 2G-I). *Prmt5* mutant embryos also showed a defect of sprouting ISV to reach the most  
147 dorsal part of the trunk and to connect with other ISVs to form the Dorsal Longitudinal  
148 Anastomotic Vessel (DLAV) (Fig. 2D, E, F). This defect was due to a reduction of ISV length  
149 compared to wild type embryos (Fig. 2E, F, K) without any impact on the number of endothelial  
150 cells (Fig. 2J). The observed size reduction of ISVs is thus most likely the result of an  
151 elongation issue rather than a proliferation defect. Of note, *prmt5* morphants reproduced the  
152 phenotype observed in *prmt5* mutants *i.e* a reduced ISV length at 28 hpf as well as a slight

## PRMT5 promotes vascular morphogenesis

153 decrease in the number of endothelial cells, thus validating our data by an alternative approach  
154 (Fig. S1 C-F).

155 To get a better insight into the impact of Prmt5 on the dynamics of vascular, we performed and  
156 compared time-lapse analyses in control with *prmt5* morphant embryos. Time-lapse confocal  
157 movies were carried out from 28 hpf to 38 hpf to follow the elongation of ISVs to the formation  
158 of an effective lumen. As compared to control morphants, if *prmt5* morphants exhibited a  
159 normal extension of ISVs, ISV lumen formation was impaired as well as the DLAV formation.  
160 Indeed, in *prmt5* morphants tip cells failed to stay connected to the stalk cells and to contact  
161 other tip cells to allow the formation of the DLAV (Fig. 3A-B). Moreover, supernumerary  
162 connections were detected in the context of *prmt5*-loss of function (Fig. 3B). Altogether, these  
163 data suggest a central role for Prmt5 in vascular morphogenesis.

164 The master gene regulator ETV2, ETS transcription factors and adhesion proteins have been  
165 shown to be involved in blood vessel formation (Pham et al. 2007, Craig et al. 2015, Hultin et  
166 al, 2014, Sauteur et al. 2014, Sauteur et al. 2017). To test whether Prmt5 could regulate the  
167 expression of these genes, we performed qPCR experiments on mutant embryos and on their  
168 wild type counterparts. While we found that *etv2* expression was not affected by the loss of  
169 *prmt5*, expression of ETS transcription factors (*fli1a*, *fli1b*) and adhesion proteins (*cdh5*, *agtr2*,  
170 *esama* and *amotl2a*) all known ETV2 target genes (Wong et al., 2009), was significantly  
171 reduced in *prmt5* mutant (Fig. 3C). As *etv2* expression was unaffected by the loss of *prmt5* but  
172 its targets were down-regulated, it is tempting to speculate that Prmt5 could modulate the  
173 activity of ETV2 at post-translational level.

### 174 ***Prmt5 methyltransferase activity is not required for vascular morphogenesis***

175 That Prmt5 modulates gene expression by methylating a variety of proteins including histones  
176 but also transcription (co)factors among others led us to test whether Prmt5 methyltransferase  
177 activity was required for vascular morphogenesis. To this end, *prmt5* mutant embryos were  
178 injected with wild type *human prmt5* mRNA (*hprmt5WT*) or with a catalytic mutant form of this

## PRMT5 promotes vascular morphogenesis

179 mRNA (*hprmt5MUT*) (Pal et al 2003) and ISVs elongation as well as expression of *etv2* target  
180 genes were analyzed. Surprisingly, both mRNAs were able to restore ISV elongation as  
181 indicated by the average ISV length in injected mutant embryos compared to non-injected  
182 mutant ones (Fig. 4A-E). We observed that the average length of ISVs in *hprmt5WT* injected  
183 mutants was even longer than intersegmental vessels of wild type embryos while the average  
184 length in *hprmt5MUT* injected mutants was significantly superior to non-injected mutants but  
185 shorter than control embryos (Fig. 4 E). Moreover, we did not notice any difference in the cell  
186 number per ISV in the different contexts (Fig. 4F). These results suggest that, despite to a  
187 different extend, both mRNAs were able to rescue the loss of *prmt5* function, suggesting that  
188 the methyltransferase activity of Prmt5 is mostly dispensable for Prmt5 function in blood vessel  
189 formation. Moreover, expression level analysis of *etv2* target genes by qPCR revealed that at  
190 the exception of *fli1a*, expression of all of them was restored similarly by injecting either  
191 *hprmt5WT* or *hprmt5MUT* mRNAs (Fig. 4G).

### 192 ***Prmt5 might help to shape correct chromatin conformation in endothelial cells***

193 As Prmt5 methyltransferase activity seems not to be required for gene expression regulation  
194 in vascular morphogenesis, we can speculate that Prmt5 could play the role of a scaffold  
195 protein in complexes mediating transcription and chromatin looping. Indeed, Prmt5 has been  
196 proposed to promote enhancer-promoter looping at the PPAR $\gamma$ 2 locus and more broadly to  
197 facilitate chromatin connection in adipocytes, *via* the recruitments of Mediator subunit MED1  
198 and of SWI/SNF chromatin remodeling complex subunit Brg1 ATPase (Leblanc et al., 2016).  
199 Thus, we decided to inspect the chromatin architecture of the flanking region of identified Prmt5  
200 regulated genes using ATAC-seq data from zebrafish endothelial cells that we previously  
201 generated (Quillien et al., 2017). Doing so, we found that all regulated genes, at the exception  
202 of *fli1a*, contained at least one putative enhancer distant at minima of 6kb from the TSS (Fig.  
203 S2 A-F) indicating that their expression could rely on proper chromatin looping. In order to gain  
204 insight into a potential role of Prmt5 in supporting proper chromatin conformation in endothelial  
205 cells, we decided to analyze the expression of *Gal4* reporter gene in an endogenous and an



## PRMT5 promotes vascular morphogenesis

206 artificial chromatin context (Fig. 5A-E). The first construction was the transgenic line  
207 *TgBAC(cdh5:GAL4FF);Tg(UAS:GFP)* that contained the sequence of an optimized version of  
208 Gal4VP16 (*GAL4FF*) inserted at the transcription start site (TSS) of *cdh5* gene between the  
209 *cdh5* promoter region (P) and a putative enhancer (E) distant of ~20kb as defined by the  
210 presence of two ATAC-seq positive regions (Fig. S2 A, Fig. 5A) (Quillien et al. 2017, Bussmann  
211 et al. 2011). Therefore, in double transgenic individuals, the level of GFP fluorescence intensity  
212 correlates with endogenous *cdh5* expression. We also generated a transgenic line where the  
213 two ATAC-seq identified regions of *cdh5* were cloned next to each other, both upstream of the  
214 *Gal4VP16* coding sequence (Fig. 5E). In double transgenic embryos *Tg(cdh5:Gal4VP16);*  
215 *Tg(UAS:KAEDE)*, the fluorescence intensity of the protein KAEDE was an artificial read out of  
216 *cdh5* transcription for which chromatin looping would not be needed. Comparing the level of  
217 fluorescence intensity in *TgBAC(cdh5:GAL4FF);Tg(UAS:GFP)* transgenic line in control  
218 condition or in the context of *prmt5* knock down, we observed a strong reduction of GFP  
219 fluorescence intensity in *prmt5* morphants (Fig. 5B-D), indicating that in an endogenous  
220 context Prmt5 was required for *cdh5* expression. In double transgenic embryos  
221 *Tg(cdh5:Gal4VP16); Tg(UAS:KAEDE)*, the fluorescent protein KAEDE was expressed in blood  
222 vessels (Fig. 5F), validating that the putative enhancer and the promoter region of *cdh5* are  
223 sufficient to drive gene expression in endothelial cells. However, in this artificial context, *prmt5*  
224 morpholino injection had no effect on the level of KAEDE fluorescence intensity as compared  
225 to control morphants (Fig. 5F-H). This result suggests that in this particular context *i.e* when  
226 chromatin looping between enhancer and promoter was not needed, Prmt5 was not required  
227 either for gene expression. This finding supports the idea that Prmt5 may play a role in the  
228 formation of the correct 3D environment for endothelial specific gene expression. Finally,  
229 rescue experiments were performed by injecting either wild type or a catalytic mutant of human  
230 *prmt5* mRNA to determine whether Prmt5 methyltransferase activity was required for the  
231 transcriptional control of *cdh5* expression in the endogenous context. We found that both wild  
232 type and mutant *hprmt5* mRNAs restored GFP fluorescence intensity in *prmt5* morphants as  
233 compared to control embryos (Fig. 5B-D, I-J). Collectively, these data indicate that the

## PRMT5 promotes vascular morphogenesis

234 transcriptional control of *cdh5* is likely independent of the Prmt5 methyltransferase activity and  
235 could rely on a role of Prmt5 as a scaffold protein to provide a proper chromatin conformation  
236 context.

### 237 DISCUSSION

238 Here we have demonstrated a role for Prmt5 in both hematopoiesis and blood vessel  
239 formation. Prmt5 promotes vascular morphogenesis through the transcriptional control of ETS  
240 transcription factor and adhesion proteins in endothelial cells. Intriguingly, we have shown that  
241 the methyltransferase activity of Prmt5 was not absolutely required to regulate gene  
242 expression, leading us to propose a role of scaffold protein for Prmt5 to facilitate chromatin  
243 looping formation in endothelial cells.

244 We found that similarly to Prmt5 in mouse (Liu et al 2015), Prmt5 plays an important role in  
245 zebrafish hematopoiesis by controlling HSCs emergence and HSPCs expansion. We also  
246 described for the first time the involvement of Prmt5 in vascular morphogenesis by regulating  
247 the expression of known genes that control this process (adhesion proteins or transcription  
248 factors) and *prmt5* loss of function partially phenocopied loss of function of these genes.  
249 Indeed, knocking down ETS protein alone had limited effect on sprout formation, while the  
250 combination of morpholinos against both *fli1a* and *fli1b*, and *ets1* led to a decreased number  
251 of vessel sprouts at 24 hpf but to a normal trunk vasculature at 48 hpf (Pham et al. 2007).  
252 Moreover, *amolt2a* knock down in zebrafish led to a reduced diameter of the DA in a similar  
253 way as we found in the context of *prmt5* loss of function (Hultin et al, 2014). Furthermore,  
254 previous studies have shown that loss of function of both *cdh5* and *esama* phenocopied what  
255 we observed in *prmt5* mutant *i.e* a disconnected stalk and tip cells and delayed formation of  
256 the DLAV formation (Sauteur et al. 2014, Sauteur et al. 2017). However, the loss of function  
257 of *cdh5* had no effect on HSCs emergence or HSPCs expansion (Anderson et al. 2015),  
258 suggesting that Prmt5 might act on different set of genes in endothelial cells and in emerging  
259 HSCs. In agreement with this hypothesis, Tan et al have proposed that Prmt5 is playing a

## PRMT5 promotes vascular morphogenesis

260 critical role in HSC quiescence through the splicing of genes involved in DNA repair (Tan et al  
261 2019).

262 Interestingly, *prmt5* mutant and the mutant for the master regulator *etv2* shared similarities in  
263 their phenotypes such as an abnormal vasculature at 48 hpf characterized by a lack of lumen  
264 formation, a lack of vessel extension and aberrant connections (Pham et al. 2007, Craig et al.  
265 2015). Similarly to the dynamics of *etv2* expression, single cell data analyses from Wagner et  
266 al. revealed that Prmt5 was expressed early in endothelial cells and that its expression  
267 decreased through time, and preceded the expression of ETV2 target genes (Wong et al.,  
268 2009, Wagner et al. 2018, Moore et al., 2013). However, we have shown that Prmt5 did not  
269 modify *etv2* expression while affecting ETV2 target genes, suggesting that Prmt5 instead of  
270 controlling *etv2* expression, could potentiate ETV2 activity through its methylation or through  
271 other mechanisms such as facilitation of ATP-dependent chromatin-remodeling complexes  
272 recruitments.

273 Prmt5 has been described to facilitate ATP-dependent chromatin remodeling to promote gene  
274 expression in skeletal muscle and during adipocyte differentiation (Dacwag et al, 2009,  
275 Leblanc et al. 2016, Leblanc et al. 2012, Pal et al.2013). Here, we proposed that Prmt5 could  
276 also be essential for proper chromatin looping in endothelial cells. Prmt5 influences gene  
277 expression only in an endogenous context where chromatin looping is required, while it is  
278 dispensable for gene expression when enhancer and promotor regions are artificially  
279 associated. This implies that Prmt5 could interact with Brg1 ATPase of SWI/SNF chromatin  
280 remodeling complex and with the mediator complex in endothelial cells as it does in muscle  
281 cells and adipocytes. Consistent with this hypothesis, *brg1* mutant mouse embryos display an  
282 anemia coupled to vascular defects in the yolk sac, characterized by thin vessels and  
283 supernumerary sprouts (Griffin et al. 2008), similarly to our present findings in zebrafish *prmt5*  
284 mutant. Interestingly, it has been proposed that the mediator complex regulates endothelial  
285 cell differentiation (Napoli et al. 2019) and the loss of *med12* subunit function in zebrafish leads  
286 to hematopoietic defects including a lack of lymphoid HSPC expansion (Keightley et al. 2011).

## PRMT5 promotes vascular morphogenesis

287 The presence of Prmt5 and Brg1 at promotor region of the *PPAR $\gamma$ 2* locus or of *myogenin* was  
288 associated with dimethylation of H3R8 (histone 3 arginine 8) (Leblanc et al. 2012, Dacwag et  
289 al. 2007) with *prmt5* knock down leading to a reduction of both histone methylation and  
290 chromatin looping formation. *In vitro*, the addition of Prmt5 to Brg1 immunopurified complexes  
291 enhanced histone methylation, while the addition of a catalytic dead version of Prmt5 did not  
292 (Pal et al. 2003). Altogether those data suggest that wild type Prmt5, when recruited to target  
293 gene promoter regions, acts most likely by dimethylating histone proteins. However, these  
294 studies did not assess the ability of Prmt5 to facilitate chromatin looping independently (or not)  
295 of its methyltransferase activity. Our data suggest that chromatin looping favored by Prmt5 did  
296 not necessarily require its methyltransferase activity. Indeed, rescue experiments  
297 demonstrated that Prmt5 was able to restore gene expression independently of its catalytic  
298 domain, with the exception of *fli1a* expression. Of note, *fli1a* putative enhancer is located only  
299 700 pb from the promotor region, suggesting that chromatin looping might not be required for  
300 *fli1a* expression, explaining the incapacity of the mutant form of Prmt5 to rescue *fli1a*  
301 expression. This data also indicates that depending on the context and the target genes  
302 considered, Prmt5 could modulate gene expression in endothelial cell through promotion of  
303 chromatin interaction but also probably *via* histones/proteins modification.

304 In conclusion, our study reveals a potential role of Prmt5 in promoting proper chromatin  
305 interaction in endothelial cell, and thus differentiation of these cells, as demonstrated during  
306 myogenesis and adipocyte differentiation. The role of Prmt5 in chromatin looping appears to  
307 be widespread in more cell types than originally thought and may be a pervasive role of Prmt5  
308 during early development that is independent of its methyltransferase activity.

## 309 MATERIALS AND METHODS

### 310 Zebrafish care and maintenance

311 Embryos were raised and staged according to standard protocols (Kimmel et al., 1995). The  
312 establishment and characterization of Tg(*gata2b*:Gal4;UAS:*lifeact*GFP), Tg(*fli1a*:eGFP),

## PRMT5 promotes vascular morphogenesis

313 Tg(TP1bglob:VenusPEST)s940, TgBAC(*cdh5*:GAL4FF);Tg(UAS:GFP), Tg(UAS:KAEDE)  
314 have been described elsewhere (Butko et al. 2015; Lawson and Weinstein 2002; Ninov et al,  
315 2012; Bussmann et al. 2011; Hatta et al. 2006). Lines generated in this study are described  
316 below. Embryos were fixed overnight at 4°C in BT-FIX, after which they were immediately  
317 processed or dehydrated and stored at -20°C until use.

### 318 **Ethics statement**

319 Fish were handled in a facility certified by the French Ministry of Agriculture (approval number  
320 A3155510). The project has received an agreement number APAFIS#7124-20161  
321 00517263944 v3. Anesthesia and euthanasia procedures were performed in Tricaine  
322 Methanesulfonate (MS222) solutions as recommended for zebrafish (0.16 mg/ml for  
323 anesthesia, 0.30 mg/ml for euthanasia). All efforts were made to minimize the number of  
324 animals used and their suffering, in accordance with the guidelines from the European directive  
325 on the protection of animals used for scientific purposes (2010/63/UE) and the guiding  
326 principles from the French Decret 2013–118.

### 327 **Plasmid construction**

328 To construct the transgene Tg(*cdh5*:GAL4VP16), we cloned the putative *cdh5* promotor  
329 (*cdh5P*) and enhancer (*cdh5E*) elements into pme\_mcs and p5E\_GGWDest+ (Addgene  
330 #49319) (Kwan et al., 2007; Kirchmaier et al., 2013) using XhoI, EcoRI and BsaI to give  
331 pme\_*cdh5P* and p5E\_*cdh5E*, respectively. The Gal4VP16 sequence from pme\_Gal4VP16  
332 (Kwan et al., 2007) was then introduced on downstream of *cdh5P* into pme\_*cdh5P* using  
333 BamHI and SpeI. We next performed a multisite LR recombination reaction (Gateway LR  
334 Clonase II Enzyme mix, Invitrogen) using p5E\_*cdh5E*, pme\_*cdh5P*:Gal4VP16, with pminTol-  
335 R4-R2pA to give pminTol- *cdh5E*-*cdh5P*: Gal4VP16.

### 336 **Generation of *prmt5*<sup>-/-</sup> mutants by CRISPR/cas9**

337 The guide RNA (gRNA) was designed using CHOPCHOP CRISPR Design website (Montague  
338 et al. 2014). The designed oligos were annealed and ligated into the gRNA plasmid pDR274

## PRMT5 promotes vascular morphogenesis

339 after digestion of the plasmid with Bsal (NEB). The gRNA was prepared *in vitro* using the  
340 MEGAscript T7 transcription kit (Ambion) after linearizing the plasmid with Dral (NEB)  
341 (Talbot and Amacher, 2014) before being purified using illustra MicroSpin G-50 Columns (GE  
342 Healthcare). 1 nL of a solution containing 10 $\mu$ M EnGen Cas9 NLS (NEB) and 100 ng/ $\mu$ l of  
343 gRNA was injected at the one-cell stage. WT, heterozygous, and homozygous *prmt5* animals  
344 were identified by PCR.

### 345 **Microinjections**

346 The Tg(*cdh5:GAL4VP16*);Tg(*UAS:KAEDE*) line was generated using pminTol- *cdh5E-cdh5P*:  
347 Gal4VP16 by Tol2 transposition as described previously (Covassin et al., 2009). Control and  
348 *prmt5* morpholino oligonucleotides (MOs) were described previously (Batut et al., 2011).  
349 Embryos from in-crosses of the indicated heterozygous carriers or wild-type adults were  
350 injected at the one- to two-cell stage with 6 ng of MO. pBluescript II KS+ hPRMT5 WT and  
351 pBluescript II KS+ hPRMT5 Mutant (Pal et al., 2003) were linearized by EcorI (NEB) and  
352 transcribed by T7 (Promega). 200 pg *hprmt5WT* mRNA, or *hprmt5 MUT* mRNA were injected  
353 at one cell stage.

### 354 **RNA extraction, Reverse transcription and real-time PCR**

355 Embryos were dissected at the indicated stage after addition of Tricaine Methanesulfonate.  
356 Genomic DNA was extracted from dissected embryo heads to identify their genotype and the  
357 corresponding dissected tails were conserved in TRIzol Reagent at -20°C. After identification  
358 of wild type and mutant embryos, total RNAs from at least 6 identified tails were extracted  
359 following manufacturer's instructions (Invitrogen). Total RNAs were converted into cDNA using  
360 Prime Script cDNA Synthesis Kit (Takara) with Oligo(dT) and random hexamer primers for  
361 15 min at 37 °C according to manufacturer's instructions. cDNAs were then diluted 20-fold and  
362 quantified by qPCR using SsoFast Evagreen Supermix (Bio-rad) and specific primers. Data  
363 were acquired on CFX96 Real-Time PCR detection System (Bio-rad). Samples were analyzed

## PRMT5 promotes vascular morphogenesis

364 in triplicates and the expression level was calculated relative to zebrafish house keeping gene  
365 *EF1 $\alpha$* .

### 366 **Live imaging**

367 For the transgenic lines *TgBAC(cdh5:GAL4FF);Tg(UAS:GFP)* and  
368 *Tg(cdh5:GAL4VP16);Tg(UAS:KAEDE)*, embryos were placed in 1.5% low melt agarose with  
369 Tricaine on a glass-bottomed culture dish filled with egg water. Images were acquired using  
370 the confocal microscope TCS SP8 (Leica Microsystems) with an L 25  $\times$  /0.95 W FLUOSTAR  
371 VIZIR objective (zoom X1.25) using the scanner resonant mode. Confocal stacks were  
372 acquired every 10 min from 28 to 38 hpf to generate movies.

### 373 **Immunostaining**

374 After fixation or rehydration, embryos were washed twice with Phosphate Buffered Saline/1%  
375 Triton X-100 (PBST), permeabilized with PBST/0.5% Trypsin for 30 sec and washed twice  
376 again with PBST. After blocking with PBST/10% Fetal Calf Serum (FCS)/1% bovine serum  
377 albumin (BSA) (hereafter termed 'blocking solution') for at least 1 h, embryos were incubated  
378 with antibodies directed against either GFP (Torrey Pine, Biolabs), or Prmt5 (Upstate 07405),  
379 in blocking solution overnight at 4 °C followed by 5 washing steps with PBST. Embryos were  
380 then incubated with the appropriate Alexa Fluor-conjugated secondary antibodies (Molecular  
381 Probes) for at least 2 h at room temperature and washed three times. Nuclei were then stained  
382 with TO-PRO3 (Molecular Probes) and washed twice with PBST. Embryos were dissected,  
383 flat-mounted in glycerol and images were recorded on a confocal microscope as above.

### 384 **Image processing and measurements**

385 Confocal images and stacks were either analyzed with ImageJ software or LAS X. Nuclei of  
386 ISV cells and *gata2b*<sup>+</sup> cells were counted using the Multipoint tool of ImageJ. ISV lengths were  
387 measured by drawing a line between the base and the tip of ISV on ImageJ. Contours of the  
388 Dorsal Aorta were drawn using the Freehand Selection Tool with a digital pen and the area

## PRMT5 promotes vascular morphogenesis

389 was then measured. Fluorescence intensity corresponded to the measurement of average  
390 gray value for each entire image.

### 391 **Statistical analysis**

392 Statistical comparisons of datasets were performed using GraphPad Prism software. For each  
393 dataset, we tested the assumption of normality with D'Agostino-Pearson tests and accordingly,  
394 unpaired t-test, Mann-Whitney test, One-way ANOVA, two-way ANOVA or Kruskal-Wallis test  
395 were used to compare dataset; means ( $\pm$  SEM) are indicated as horizontal bars on dot plots.  
396 The test used as well as the number of independent experiments performed and the minimal  
397 number of biological replicates are indicated in each figure legend.

| Name/application                        | Sequence 5'-3'                        |
|-----------------------------------------|---------------------------------------|
| sgRNA1- <i>zPrmt5</i> -FWD              | TAGGGGTGGAACAGCGGCATACAC              |
| sgRNA1- <i>zPrmt5</i> -REV              | AAACGTGTATGCCGCTGTTCCACC              |
| genotyping- <i>zPrmt5</i> -FWD          | CAAGACCTGTCCTGTTTATGATGA              |
| genotyping- <i>zPrmt5</i> -REV          | GTGACTTTGCAGGGTCCAGT                  |
| XhoI-promocdh5-FWD                      | CCGCTCGAGCCAGGGGCATTTATCTTGG          |
| EcoRI-promocdh5-REV                     | CGGAATCAACGATCGCATACCAGAGT            |
| BsaI-distenhcdh5-FWD                    | GTAACGGGTCTCCATGGGACAACAGTCAAATGTAGCA |
| BsaI-distenhcdh5-REV                    | GTAACGGGTCTCCCTTACACTCGCATAACAATTTCCA |
| BamHI- <i>gal4VP16</i> -FWD             | CGGGATCCGCCACCATGAAGCTACTGTCTTCTATC   |
| SpeI- <i>gal4VP16</i> -REV              | GGACTAGTCTACATATCCAGAGCGCCG           |
| <i>scla</i> -qPCR-FWD                   | ATGGATGACCCTCCACAAAA                  |
| <i>scla</i> -qPCR-REV                   | TCCCGTTTAGCTTCTCATC                   |
| <i>runx1</i> -qPCR-FWD                  | AACTGGCGCTGCAACAAG                    |
| <i>runx1</i> -qPCR-REV                  | CATCATTTCCCGCCACT                     |
| <i>cmyb</i> -qPCR-FWD                   | GAACGGCTACGGTGGCTGGAA                 |
| <i>cmyb</i> -qPCR-REV                   | CAGAGTCCAGCGAAGGACTGT                 |
| <i>EF1<math>\alpha</math></i> -qPCR-FWD | GCATACATCAAGAAGATCGGC                 |
| <i>EF1<math>\alpha</math></i> -qPCR-REV | GCAGCCTTCTGTGCAGACTTTG                |
| <i>agtr2</i> -qPCR-FWD                  | GTCATGTGCAAGCTGTGTGG                  |
| <i>agtr2</i> -qPCR-REV                  | AACACATGAACCAACCGGCC                  |
| <i>esama</i> -qPCR-FWD                  | AGACACCGAGGAGGATCTGG                  |
| <i>esama</i> -qPCR-REV                  | GCTGGGTTGGTGTGTATCC                   |
| <i>amotl2a</i> -qPCR-FWD                | GGGCACTTATGCTCAACTCTTG                |
| <i>amotl2a</i> -qPCR-REV                | CGGCCTTGCTCTCGTCTT                    |
| <i>fli1b</i> -qPCR-FWD                  | TTCCATCAGCAGTCGTCTTG                  |
| <i>fli1b</i> -qPCR-REV                  | TAGTCCCTCCAGGTGATG                    |
| <i>etv2</i> -qPCR-FWD                   | TGCCTTGGAGGAAGAAAGA                   |



## PRMT5 promotes vascular morphogenesis

|                        |                          |
|------------------------|--------------------------|
| <i>etv2</i> -qPCR-REV  | CTGTTGTTGGCAATCTGCTG     |
| <i>cdh5</i> -qPCR-FWD  | CGAGATTGCTGATGGAGGAACGCC |
| <i>cdh5</i> -qPCR-REV  | TGGCGAGGAGGGCACTGACA     |
| <i>fli1a</i> -qPCR-FWD | CCAAACATGACGACCAATGAGA   |
| <i>fli1a</i> -qPCR-REV | GTGATCCGGAGACCACAGAGA    |

398

### 399 ACKNOWLEDGEMENTS

400 We would like to thank the Blader lab for helpful discussions and support; Dr. Cau, and Dr.  
401 Male and Dr. Navajas Acedo for critical reading of the manuscript; Aurore Laire for excellent  
402 zebrafish care; the Toulouse Rio Imaging (TRI) platform; Dr. Herbomel for the Zebrafish  
403 transgenic line *Tg(gata2b:Gal4;UAS:lifeactGFP)*. This work was supported by a grant from the  
404 Fondation de l'Association pour la Recherche contre le Cancer (Fondation ARC) and from the  
405 Association Française contre les Myopathies (AFM) to LV. AQ was supported by a fellowship  
406 from the Fondation ARC.

### 407 COMPETING INTEREST

408 The authors declare no competing interests.

### 409 REFERENCES

- 410 Batut, J., C. Duboe, and L. Vandel. "The Methyltransferases Prmt4/Carm1 and Prmt5 Control  
411 Differentially Myogenesis in Zebrafish." *PLoS One* 6, no. 10 (2011): e25427.
- 412 Blanc, R. S., and S. Richard. "Arginine Methylation: The Coming of Age." *Mol Cell* 65, no. 1 (Jan 5  
413 2017): 8-24.
- 414 Bussmann, J., and S. Schulte-Merker. "Rapid Bac Selection for Tol2-Mediated Transgenesis in  
415 Zebrafish." *Development* 138, no. 19 (Oct 2011): 4327-32.
- 416 Butko, E., M. Distel, C. Pouget, B. Weijts, I. Kobayashi, K. Ng, C. Mosimann, *et al.* "Gata2b Is a  
417 Restricted Early Regulator of Hemogenic Endothelium in the Zebrafish Embryo."  
418 *Development* 142, no. 6 (Mar 15 2015): 1050-61.
- 419 Carmeliet, P., V. Ferreira, G. Breier, S. Pollefeyt, L. Kieckens, M. Gertsenstein, M. Fahrig, *et al.*  
420 "Abnormal Blood Vessel Development and Lethality in Embryos Lacking a Single Vegf Allele."  
421 *Nature* 380, no. 6573 (Apr 4 1996): 435-9.
- 422 Covassin, L. D., A. F. Siekmann, M. C. Kacergis, E. Laver, J. C. Moore, J. A. Villefranc, B. M. Weinstein,  
423 and N. D. Lawson. "A Genetic Screen for Vascular Mutants in Zebrafish Reveals Dynamic  
424 Roles for Vegf/Plcg1 Signaling During Artery Development." *Dev Biol* 329, no. 2 (May 15  
425 2009): 212-26.
- 426 Covassin, L. D., J. A. Villefranc, M. C. Kacergis, B. M. Weinstein, and N. D. Lawson. "Distinct Genetic  
427 Interactions between Multiple Vegf Receptors Are Required for Development of Different  
428 Blood Vessel Types in Zebrafish." *Proc Natl Acad Sci U S A* 103, no. 17 (Apr 25 2006): 6554-9.

## PRMT5 promotes vascular morphogenesis

- 429 Craig, M. P., V. Grajevskaja, H. K. Liao, J. Balciuniene, S. C. Ekker, J. S. Park, J. J. Essner, D. Balciunas,  
430 and S. Sumanas. "Etv2 and Fli1b Function Together as Key Regulators of Vasculogenesis and  
431 Angiogenesis." *Arterioscler Thromb Vasc Biol* 35, no. 4 (Apr 2015): 865-76.
- 432 Dacwag, C. S., M. T. Bedford, S. Sif, and A. N. Imbalzano. "Distinct Protein Arginine  
433 Methyltransferases Promote Atp-Dependent Chromatin Remodeling Function at Different  
434 Stages of Skeletal Muscle Differentiation." *Mol Cell Biol* 29, no. 7 (Apr 2009): 1909-21.
- 435 Fish, J. E., M. Cantu Gutierrez, L. T. Dang, N. Khyzha, Z. Chen, S. Veitch, H. S. Cheng, *et al.* "Dynamic  
436 Regulation of Vegf-Inducible Genes by an Erk/Erg/P300 Transcriptional Network."  
437 *Development* 144, no. 13 (Jul 1 2017): 2428-44.
- 438 Griffin, C. T., J. Brennan, and T. Magnuson. "The Chromatin-Remodeling Enzyme Brg1 Plays an  
439 Essential Role in Primitive Erythropoiesis and Vascular Development." *Development* 135, no.  
440 3 (Feb 2008): 493-500.
- 441 Hatta, K., H. Tsujii, and T. Omura. "Cell Tracking Using a Photoconvertible Fluorescent Protein." *Nat*  
442 *Protoc* 1, no. 2 (2006): 960-7.
- 443 Hultin, S., Y. Zheng, M. Mojallal, S. Vertuani, C. Gentili, M. Bolland, R. Milloud, *et al.* "Amotl2 Links Ve-  
444 Cadherin to Contractile Actin Fibres Necessary for Aortic Lumen Expansion." *Nat Commun* 5  
445 (May 7 2014): 3743.
- 446 Kalna, V., Y. Yang, C. R. Peghaire, K. Frudd, R. Hannah, A. V. Shah, L. Osuna Almagro, *et al.* "The  
447 Transcription Factor Erg Regulates Super-Enhancers Associated with an Endothelial-Specific  
448 Gene Expression Program." *Circ Res* 124, no. 9 (Apr 26 2019): 1337-49.
- 449 Karkhanis, V., Y. J. Hu, R. A. Baiocchi, A. N. Imbalzano, and S. Sif. "Versatility of Prmt5-Induced  
450 Methylation in Growth Control and Development." *Trends Biochem Sci* 36, no. 12 (Dec 2011):  
451 633-41.
- 452 Keightley, M. C., J. E. Layton, J. W. Hayman, J. K. Heath, and G. J. Lieschke. "Mediator Subunit 12 Is  
453 Required for Neutrophil Development in Zebrafish." *PLoS One* 6, no. 8 (2011): e23845.
- 454 Kimmel, C. B., W. W. Ballard, S. R. Kimmel, B. Ullmann, and T. F. Schilling. "Stages of Embryonic  
455 Development of the Zebrafish." *Dev Dyn* 203, no. 3 (Jul 1995): 253-310.
- 456 Kirchmaier, S., K. Lust, and J. Wittbrodt. "Golden Gateway Cloning--a Combinatorial Approach to  
457 Generate Fusion and Recombination Constructs." *PLoS One* 8, no. 10 (2013): e76117.
- 458 Kwan, K. M., E. Fujimoto, C. Grabher, B. D. Mangum, M. E. Hardy, D. S. Campbell, J. M. Parant, *et al.*  
459 "The Tol2kit: A Multisite Gateway-Based Construction Kit for Tol2 Transposon Transgenesis  
460 Constructs." *Dev Dyn* 236, no. 11 (Nov 2007): 3088-99.
- 461 Lawson, N. D., and B. M. Weinstein. "In Vivo Imaging of Embryonic Vascular Development Using  
462 Transgenic Zebrafish." *Dev Biol* 248, no. 2 (Aug 15 2002): 307-18.
- 463 LeBlanc, S. E., S. Konda, Q. Wu, Y. J. Hu, C. M. Oslowski, S. Sif, and A. N. Imbalzano. "Protein Arginine  
464 Methyltransferase 5 (Prmt5) Promotes Gene Expression of Peroxisome Proliferator-Activated  
465 Receptor Gamma2 (Ppargamma2) and Its Target Genes During Adipogenesis." *Mol Endocrinol*  
466 26, no. 4 (Apr 2012): 583-97.
- 467 LeBlanc, S. E., Q. Wu, P. Lamba, S. Sif, and A. N. Imbalzano. "Promoter-Enhancer Looping at the  
468 Ppargamma2 Locus During Adipogenic Differentiation Requires the Prmt5  
469 Methyltransferase." *Nucleic Acids Res* 44, no. 11 (Jun 20 2016): 5133-47.
- 470 Liu, F., G. Cheng, P. J. Hamard, S. Greenblatt, L. Wang, N. Man, F. Perna, *et al.* "Arginine  
471 Methyltransferase Prmt5 Is Essential for Sustaining Normal Adult Hematopoiesis." *J Clin*  
472 *Invest* 125, no. 9 (Sep 2015): 3532-44.
- 473 Liu, F., D. Li, Y. Y. Yu, I. Kang, M. J. Cha, J. Y. Kim, C. Park, *et al.* "Induction of Hematopoietic and  
474 Endothelial Cell Program Orchestrated by Ets Transcription Factor Er71/Etv2." *EMBO Rep* 16,  
475 no. 5 (May 2015): 654-69.
- 476 Ma, D., Y. Wei, and F. Liu. "Regulatory Mechanisms of Thymus and T Cell Development." *Dev Comp*  
477 *Immunol* 39, no. 1-2 (Jan-Feb 2013): 91-102.
- 478 Mans, B. J., J. F. Andersen, I. M. Francischetti, J. G. Valenzuela, T. G. Schwan, V. M. Pham, M. K.  
479 Garfield, C. H. Hammer, and J. M. Ribeiro. "Comparative Sialomics between Hard and Soft

## PRMT5 promotes vascular morphogenesis

- 480 Ticks: Implications for the Evolution of Blood-Feeding Behavior." *Insect Biochem Mol Biol* 38,  
481 no. 1 (Jan 2008): 42-58.
- 482 Montague, T. G., J. M. Cruz, J. A. Gagnon, G. M. Church, and E. Valen. "Chopchop: A Crispr/Cas9 and  
483 Talen Web Tool for Genome Editing." *Nucleic Acids Res* 42, no. Web Server issue (Jul 2014):  
484 W401-7.
- 485 Moore, J. C., S. Sheppard-Tindell, I. A. Shestopalov, S. Yamazoe, J. K. Chen, and N. D. Lawson. "Post-  
486 Transcriptional Mechanisms Contribute to Etv2 Repression During Vascular Development."  
487 *Dev Biol* 384, no. 1 (Dec 1 2013): 128-40.
- 488 Napoli, C., C. Schiano, and A. Soricelli. "Increasing Evidence of Pathogenic Role of the Mediator (Med)  
489 Complex in the Development of Cardiovascular Diseases." *Biochimie* 165 (Oct 2019): 1-8.
- 490 Ninov, N., M. Borius, and D. Y. Stainier. "Different Levels of Notch Signaling Regulate Quiescence,  
491 Renewal and Differentiation in Pancreatic Endocrine Progenitors." *Development* 139, no. 9  
492 (May 2012): 1557-67.
- 493 Pal, S., R. Yun, A. Datta, L. Lacomis, H. Erdjument-Bromage, J. Kumar, P. Tempst, and S. Sif.  
494 "Msin3a/Histone Deacetylase 2- and Prmt5-Containing Brg1 Complex Is Involved in  
495 Transcriptional Repression of the Myc Target Gene Cad." *Mol Cell Biol* 23, no. 21 (Nov 2003):  
496 7475-87.
- 497 Pham, V. N., N. D. Lawson, J. W. Mugford, L. Dye, D. Castranova, B. Lo, and B. M. Weinstein.  
498 "Combinatorial Function of Ets Transcription Factors in the Developing Vasculature." *Dev Biol*  
499 303, no. 2 (Mar 15 2007): 772-83.
- 500 Quillien, A., M. Abdalla, J. Yu, J. Ou, L. J. Zhu, and N. D. Lawson. "Robust Identification of  
501 Developmentally Active Endothelial Enhancers in Zebrafish Using Fans-Assisted Atac-Seq."  
502 *Cell Rep* 20, no. 3 (Jul 18 2017): 709-20.
- 503 Quillien, A., J. C. Moore, M. Shin, A. F. Siekmann, T. Smith, L. Pan, C. B. Moens, M. J. Parsons, and N.  
504 D. Lawson. "Distinct Notch Signaling Outputs Pattern the Developing Arterial System."  
505 *Development* 141, no. 7 (Apr 2014): 1544-52.
- 506 Rosa-Garrido, M., D. J. Chapski, and T. M. Vondriska. "Epigenomes in Cardiovascular Disease." *Circ*  
507 *Res* 122, no. 11 (May 25 2018): 1586-607.
- 508 Sauter, L., M. Affolter, and H. G. Belting. "Distinct and Redundant Functions of Esam and Ve-  
509 Cadherin During Vascular Morphogenesis." *Development* 144, no. 8 (Apr 15 2017): 1554-65.
- 510 Sauter, L., A. Krudewig, L. Herwig, N. Ehrenfeuchter, A. Lenard, M. Affolter, and H. G. Belting.  
511 "Cdh5/Ve-Cadherin Promotes Endothelial Cell Interface Elongation Via Cortical Actin  
512 Polymerization During Angiogenic Sprouting." *Cell Rep* 9, no. 2 (Oct 23 2014): 504-13.
- 513 Shailesh, H., Z. Z. Zakaria, R. Baiocchi, and S. Sif. "Protein Arginine Methyltransferase 5 (Prmt5)  
514 Dysregulation in Cancer." *Oncotarget* 9, no. 94 (Nov 30 2018): 36705-18.
- 515 Shalaby, F., J. Ho, W. L. Stanford, K. D. Fischer, A. C. Schuh, L. Schwartz, A. Bernstein, and J. Rossant.  
516 "A Requirement for Flk1 in Primitive and Definitive Hematopoiesis and Vasculogenesis." *Cell*  
517 89, no. 6 (Jun 13 1997): 981-90.
- 518 Stopa, N., J. E. Krebs, and D. Shechter. "The Prmt5 Arginine Methyltransferase: Many Roles in  
519 Development, Cancer and Beyond." *Cell Mol Life Sci* 72, no. 11 (Jun 2015): 2041-59.
- 520 Talbot, J. C., and S. L. Amacher. "A Streamlined Crispr Pipeline to Reliably Generate Zebrafish  
521 Frameshifting Alleles." *Zebrafish* 11, no. 6 (Dec 2014): 583-5.
- 522 Tan, D. Q., Y. Li, C. Yang, J. Li, S. H. Tan, D. W. L. Chin, A. Nakamura-Ishizu, H. Yang, and T. Suda.  
523 "Prmt5 Modulates Splicing for Genome Integrity and Preserves Proteostasis of  
524 Hematopoietic Stem Cells." *Cell Rep* 26, no. 9 (Feb 26 2019): 2316-28 e6.
- 525 Tee, W. W., M. Pardo, T. W. Theunissen, L. Yu, J. S. Choudhary, P. Hajkova, and M. A. Surani. "Prmt5  
526 Is Essential for Early Mouse Development and Acts in the Cytoplasm to Maintain Es Cell  
527 Pluripotency." *Genes Dev* 24, no. 24 (Dec 15 2010): 2772-7.
- 528 Wagner, D. E., C. Weinreb, Z. M. Collins, J. A. Briggs, S. G. Megason, and A. M. Klein. "Single-Cell  
529 Mapping of Gene Expression Landscapes and Lineage in the Zebrafish Embryo." *Science* 360,  
530 no. 6392 (Jun 1 2018): 981-87.

## PRMT5 promotes vascular morphogenesis

531 Wong, K. S., K. Proulx, M. S. Rost, and S. Sumanas. "Identification of Vasculature-Specific Genes by  
532 Microarray Analysis of Etsrp/Etv2 Overexpressing Zebrafish Embryos." *Dev Dyn* 238, no. 7 (Jul  
533 2009): 1836-50.  
534 Zhu, J., D. Zhang, X. Liu, G. Yu, X. Cai, C. Xu, F. Rong, *et al.* "Zebrafish Prmt5 Arginine  
535 Methyltransferase Is Essential for Germ Cell Development." *Development* 146, no. 20 (Oct 14  
536 2019).

537

### 538 **FIGURE LEGENDS**

539 **Figure 1: Loss of *prmt5* affect HSCs and HSPCs production.** **A-** Schematic representation  
540 of the sequence targeted by CRISPR/Cas9 leading to a 23 nucleotide deletion, and of wild  
541 type and truncated Prmt5 proteins. The catalytic domain "CAT" appears in magenta. **B-C-**  
542 Confocal section of immunostaining with anti-Prmt5 antibody of wild type and *prmt5* mutant  
543 embryos at 24 hpf. Scale bar 100  $\mu$ m. **D-** Schematic representation of vascular (green) and  
544 hematopoietic (red) systems in a zebrafish larvae. Circle and bracket indicate the Thymus (T)  
545 and the Caudal Hematopoietic Tissue (CHT), respectively. **D'-** Close-up of the trunk  
546 vasculature where HSCs emerge from the ventral wall of the dorsal aorta (DA), bud and  
547 migrate. Red line represents the diameter of the dorsal aorta. Cardinal Vein (CV). **E-F'-**  
548 Confocal section of transgenic *Tg(gata2b:Gal4; UAS:lifeactGFP)* embryos at 36 hpf showing  
549 *gata2b*<sup>+</sup> cells in red and TO-PRO-3 in black. Blue arrows indicate HSCs labelled in red in wild  
550 type (**E, E'**) and in *prmt5* mutant (**F, F'**) embryos. Bar scale 100  $\mu$ m. **G-** Average number of  
551 HSCs enumerated per confocal stack in wild type and in *prmt5* mutant embryos at 36 hpf. Data  
552 are from 3 independent experiments with at least 6 individuals per experiment and a Mann-  
553 Whitney test was performed. **H-** Relative mRNA expressions determined by RT-qPCR in 36  
554 hpf wild type and *prmt5* mutant embryos, from 3 independent experiments with at least 6  
555 animals per condition. Two way ANOVA was performed. **I-J-** Confocal section of wild type (**I**)  
556 and *prmt5* mutant (**J**) thymus from transgenic *Tg(gata2b:Gal4; UAS:lifeactGFP)* embryos at 5  
557 days. Thymus are delimited by a white circle. Bar scale 100  $\mu$ m. **K-** Average number of HSPCs  
558 enumerated per confocal stack in wild type and *prmt5* mutant embryos at 5 days from 3  
559 independent experiments with at least 5 individuals per analysis. T-test was performed. \*  
560  $P < 0.05$ , \*\*  $P < 0.01$ , \*\*\*  $P < 0.001$ .

## PRMT5 promotes vascular morphogenesis

561 **Figure 2: Loss of *prmt5* impairs blood vessel formation. A-C'**- Confocal projections of  
562 transgenic *Tg(fli1a:GFP)<sup>y1</sup>* embryos with endothelial cells (in green) after immunostaining  
563 against Prmt5 (in magenta). **A-A''**- Dorsal view of the lateral plate mesoderm at 14 somites.  
564 Yellow rectangle delimits the close up of Prmt5+ endothelial cells (**A'-A''**). Prmt5+ cells  
565 appears in magenta (**A-A''**) and endothelial cells in green (**A-A'**). Anterior is on top. Scale bars  
566 100  $\mu\text{m}$  (**A**) and 25  $\mu\text{m}$  (**A'**). **B-B'**- Confocal projection focusing on endothelial cells (in green)  
567 from the dorsal aorta (DA) and the cardinal vein (CV) at 24 hpf. Red and blue arrows point to  
568 Prmt5+ cells (in magenta) from the DA and the CV, respectively. Red and blue lines represent  
569 DA and CV diameters, respectively. Scale bar 50  $\mu\text{m}$ . **C-C'**- Confocal projection focusing on  
570 sprouting ISVs (in green) at 24 hpf. Light blue and yellow arrows point to tip and stalk cell,  
571 respectively. **D**- Schematic representation of the trunk vasculature with ISVs sprouting from  
572 the DA. The tip cell leads the cell migration and the stalk cell maintains the connection with the  
573 DA. **E-F**- Confocal projection of transgenic *Tg(fli1a:GFP)<sup>y1</sup>* wild type (**E**) and *prmt5* mutant (**F**)  
574 embryos at 28 hpf. Red rectangles delimit where DA close ups was made. White rectangles  
575 delimit the higher magnification (x2) of the DA with red lines indicating the dorsal aorta  
576 diameters. White arrows indicate the connection point between two ISVs to form the Dorsal  
577 Longitudinal Anastomotic Vessel (DLAV). Scale bar 100  $\mu\text{m}$ . **G-H**- Confocal projections of  
578 control morphant (**G**) and *prmt5* morphant (**H**) transgenic *Tg(TP1bglob:VenusPEST)<sup>s940</sup>*  
579 embryos labelling cells from the DA at 28 hpf. Yellow lines delimit the measured area occupied  
580 by the DA. Scale bar 25  $\mu\text{m}$  **I**- Average area occupied by the DA in  $\mu\text{m}^2$  in control and *prmt5*  
581 morpholino injected embryos from 2 independent experiments with at least 8 animals per  
582 condition. T-test was performed. **J-K**- Average number of endothelial cells per intersegmental  
583 vessel (**J**) and average ISV length in  $\mu\text{m}$  (**K**) in control and in *prmt5* mutant embryos from 3  
584 independent experiments with at least 3 animals per condition. T-test and Mann Whitney test  
585 were performed, respectively. \*\* P<0.01, \*\*\*P<0.001.

586 **Figure3: Prmt5 is required for vascular morphogenesis. A-B**- Still images from Movies S1  
587 and S2 from control (**A**) and *prmt5* morphant (**B**) *Tg(fli1a:GFP)<sup>y1</sup>* transgenic embryos from 28

## PRMT5 promotes vascular morphogenesis

588 to 38 hpf. Red asterisks labelled missing connections between tip and stalk cells as well as  
589 missing connections between tip cells that should lead to DLAV formation. Red arrows point  
590 to connecting ISVs leading to DLAV formation. White arrows indicate supernumerary sprouts.  
591 Yellow asterisks label the lumen of ISVs. Scale bar 50  $\mu$ m. **C-** Relative mRNA expressions of  
592 the indicated transcripts were determined by RT-qPCR in 28 hpf wild type and *prmt5* mutant  
593 embryos, from 3 independent experiments with at least 6 animals per condition. Two way  
594 ANOVA was performed. \*  $P < 0.05$ , \*\*\* $P < 0.001$ .

### 595 **Figure 4: Prmt5 methyltransferase activity is dispensable for vascular morphogenesis.**

596 **A-D-** Confocal projection of transgenic *Tg(fli1a:GFP)<sup>y1</sup>* embryos at 28 hpf. Wild type embryo is  
597 on the top left panel (**A**), *prmt5* mutant embryos were not injected (**B**) or injected with either  
598 *hprmt5WT* mRNA (**C**) or the mutant form *hprmt5MUT* mRNA (**D**). Scale bar 100  $\mu$ m. **E-F-**  
599 Average ISVs length in  $\mu$ m (**E**) and average number of endothelial cells per ISVs (**F**) for wild  
600 type, *prmt5* mutant embryos not injected or injected with *hprmt5WT* mRNA, or *hprmt5 MUT*  
601 mRNA, from 3 independent experiments with at least 3 animals per condition. Kruskal-Wallis  
602 test (**E**) and One way ANOVA (**F**) were performed. \*\*  $P < 0.01$ , \*\*\*  $P < 0.001$ . **G-** Relative mRNA  
603 expressions were determined by RT-qPCR on 28 hpf wild type and *prmt5* mutant embryos  
604 injected by either *hprmt5WT* or *hprmt5MUT* mRNAs, from 2 independent experiments with at  
605 least 6 animals per condition. Two way ANOVA was performed. \*  $P < 0.05$ .

### 606 **Figure 5: Prmt5 promotes chromatin looping.**

607 **A-** Schematic representation of the transgene  
*TgBAC(cdh5:GAL4FF)* containing two putative cis-regulatory elements, a promotor region (P)  
608 and an enhancer (E), separated by ~20kb with the *GAL4FF* reporter gene inserted at the TSS  
609 of *cdh5*. **B, C, I, J-** Confocal projections of transgenic *TgBAC(cdh5:GAL4FF);Tg(UAS:GFP)*  
610 embryos at 28 hpf. Control morphant is on the top left panel (**B**), *prmt5* morphant embryos  
611 were not injected (**C**) or injected by either *hprmt5WT* mRNA (**I**) or the catalytic mutant form  
612 *hprmt5MUT* (**J**) mRNA. The fluorescent intensity is colored coded, from the Low intensity (L)  
613 in black to High intensity (H) in white (intensity scale as in panel **B**). Scale bar 100  $\mu$ m. **D-**  
614 Average GFP fluorescence intensity per confocal projection for control, *prmt5* morphant

## PRMT5 promotes vascular morphogenesis

615 embryos injected by *hprmt5<sup>WT</sup>* mRNA, or *hprmt5<sup>MUT</sup>* mRNA or not injected, from 3  
616 independent experiments with at least 3 animals per condition. One way ANOVA was  
617 performed. \*  $P < 0.05$ , \*\* $P < 0.01$ . **E-** Schematic representation of the transgene  
618 Tg(*cdh5:GAL4VP16*) containing the two putative cis-regulatory elements next to each other (E  
619 and P), upstream of *GAL4VP16* reporter gene. **F-G-** Confocal projection of transgenic  
620 Tg(*cdh5:GAL4VP16*);Tg(*UAS:KAEDE*) embryos at 26 hpf injected with either a control  
621 morpholino (**F**) or a *prmt5* morpholino (**G**). The fluorescence intensity is color- coded, from the  
622 Low intensity (L) in black to High intensity (H) in white (intensity scale in panel **B**). **H-** Average  
623 KAEDE fluorescence intensity for control and for *prmt5* morphant embryos, from 3 independent  
624 experiments with at least 5 animals per condition. T-test was performed.

625 **Figure S1: A-B-** Confocal section of Prmt5 immunostaining in control and *prmt5* morphant  
626 embryos at 24 hpf. Scale bar 100  $\mu\text{m}$ . **C-D-** Confocal projections of transgenic Tg(*fli1a:GFP*)<sup>y1</sup>  
627 embryos injected by either control morpholino (**C**) or *prmt5* morpholino (**D**). **E-F-** Average  
628 number of endothelial cells per ISV (**E**) and average ISV length in  $\mu\text{m}$  (**F**), in control and *prmt5*  
629 morphant embryos, from 3 independent experiments with at least 4 animals per condition. T-  
630 test and Mann-Whitney test were performed. \*\*\*  $P < 0.001$ .

631 **Figure S2:** Chromatin profile visualization of endothelial cells from the UCSC Genome  
632 Browser. ATAC-seq peaks as determined by Quillien et al. (Quillien et al. 2017) flanking  
633 indicated genes (*cdh5*, *esama*, *agtr2*, *fli1a*, *fli1b*, *amotl2a*). Promoter regions (P) and putative  
634 enhancers (E) are highlighted in light orange and light purple, respectively.

figure 1

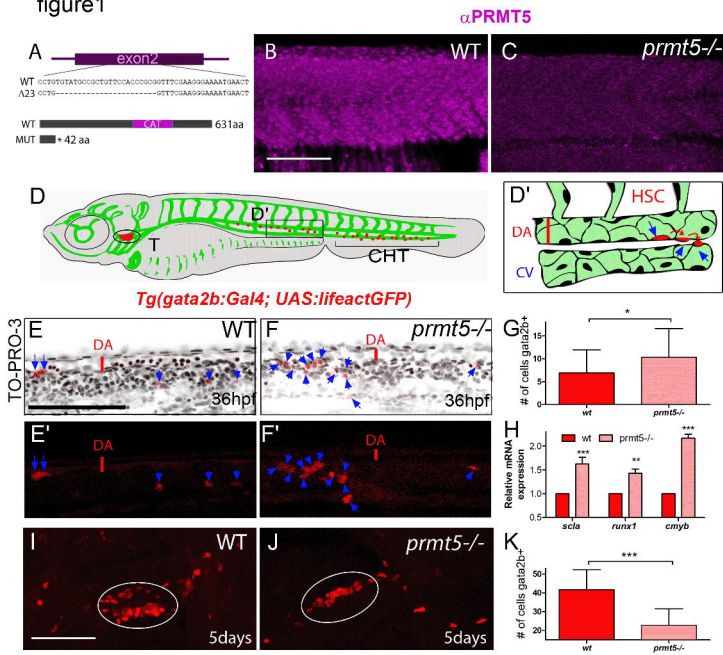





figure3

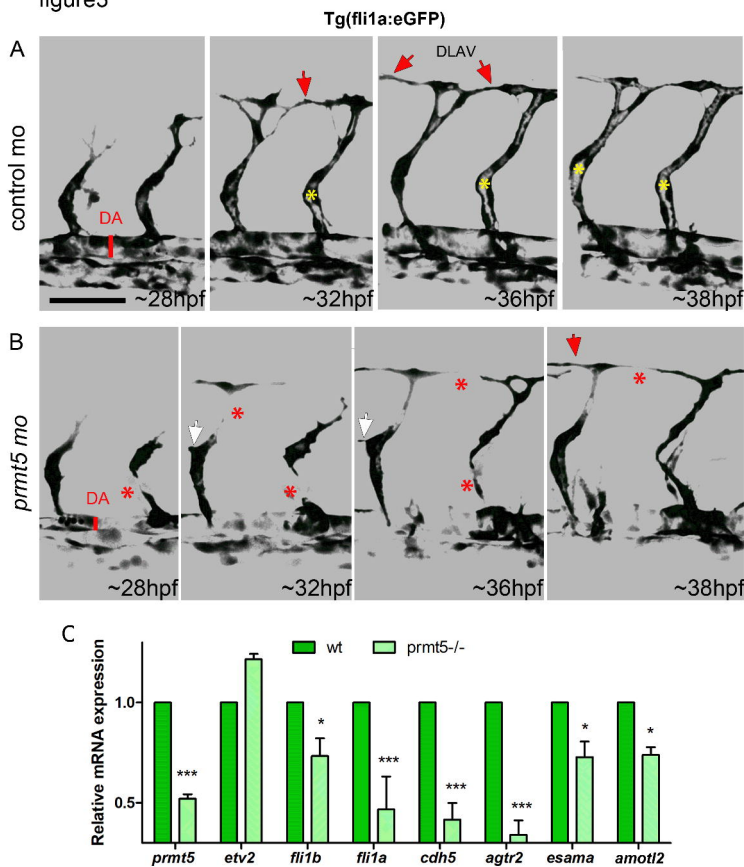

figure4

Tg(*fli1a*:eGFP)

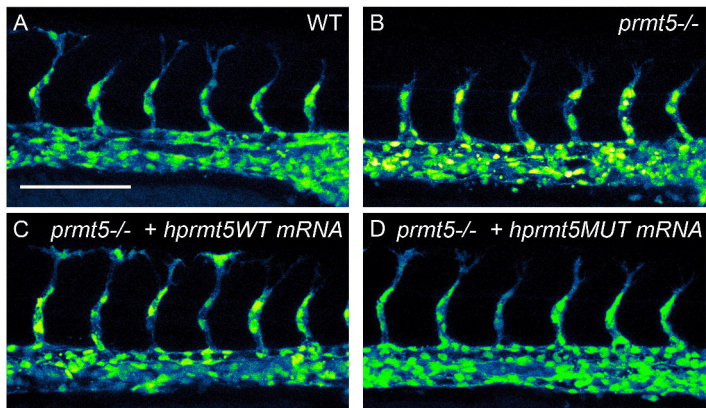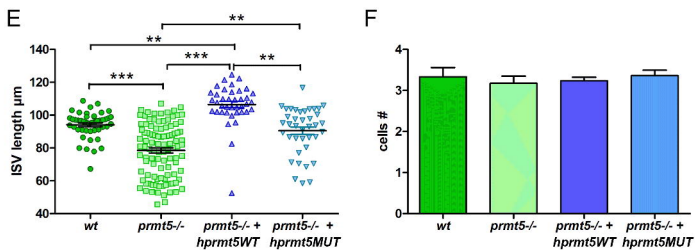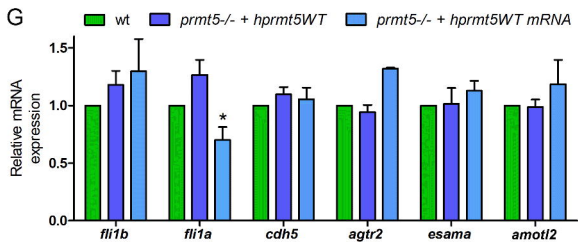

figure5

A TgBAC(cdh5:GAL4FF);Tg(UAS:GFP)

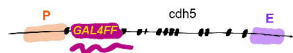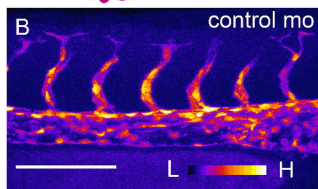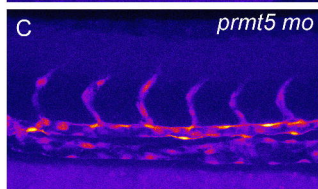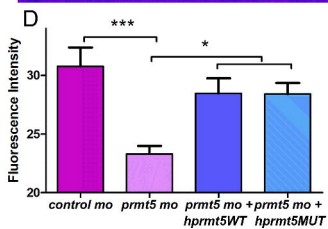

E Tg(cdh5:Gal4VP16); Tg(UAS:KAEDE)

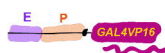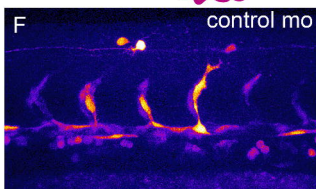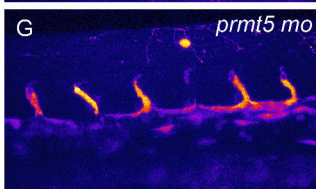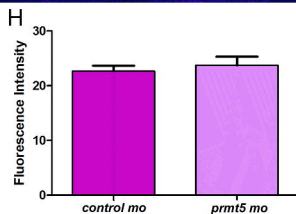

TgBAC(cdh5:GAL4FF);Tg(UAS:GFP)

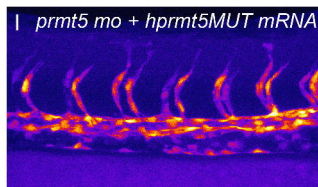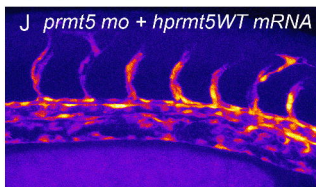

figureS1

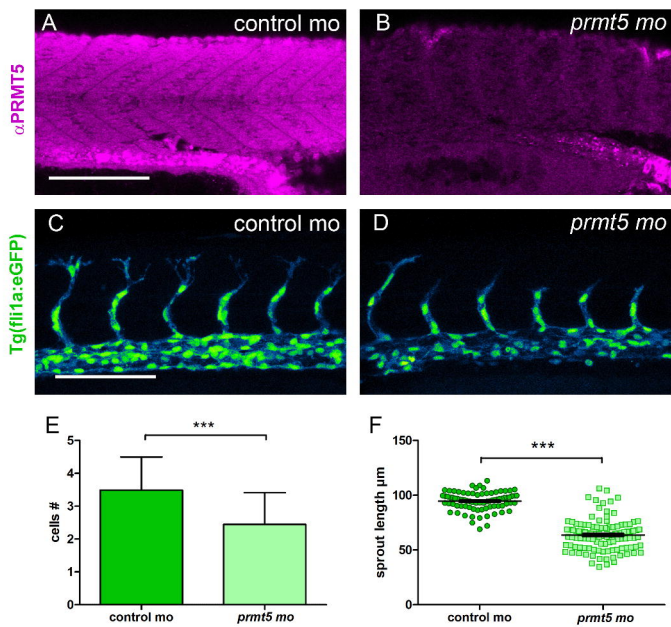

figureS2

*Acdh5*

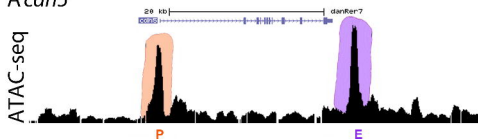

*Besama*

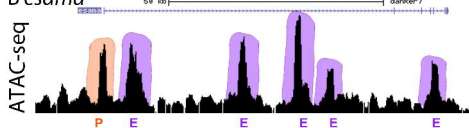

*Cagtr2*

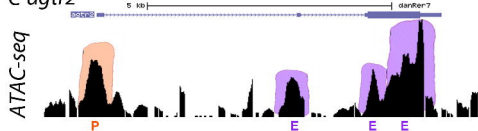

*Dfli1a*

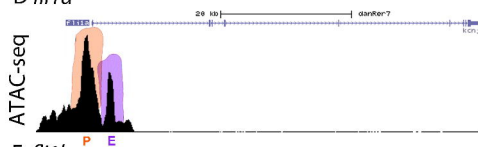

*Efli1b*

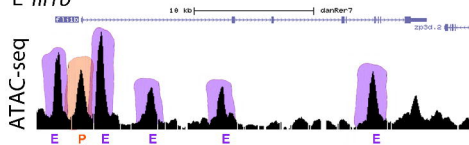

*Famotl2a*

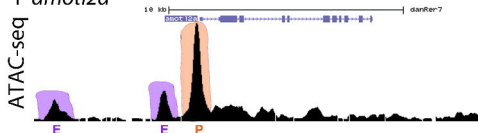

Source: http://biorxiv.org/content/10.1101/2020.02.27.967810v1.full.pdf
